# Supplementary material for: Characterization and co-expression analysis of WRKY orthologs involved in responses to multiple abiotic stresses in Pak-choi (Brassica campestris ssp. chinensis)
Source: PubMed Central journal article supplement (PMC4222839; doi:10.1186/1471-2229-13-188), 2013-11-25
Supplement: 1471-2229-13-188-S1.pdf [file 1471-2229-13-188-S1.pdf]

**Supplemental Table S1 Primers used for RT-PCR and real-time PCR**

| <b>Gene name</b> | <b>Usage of primer</b> | <b>Forward Primer (5'-3')</b> | <b>Reverse Primer(5'-3')</b> | <b>Amplicon Lengtht (bp)</b> |
|------------------|------------------------|-------------------------------|------------------------------|------------------------------|
| <i>BcWRKY1</i>   | ORF amplication        | ATGGACTGTCTTCTTCTTCTTGAC      | TCATGTTCTAGACTGCTCCATTAAC    | 858                          |
|                  | qRT-PCR                | GGATCTGGTTCATAGTGGTCAG        | TAACGAAGACGCCATTTGCCGAAC     | 125                          |
| <i>BcWRKY2</i>   | ORF amplication        | ATGTCTGGTTTTGATGAAAACGT       | TCAAATCTGTGGTAATCTACTC       | 2067                         |
|                  | qRT-PCR                | CGGTTACTCGTTCGGTTTAGG         | CGGTTGAGTCATATACGGGTG        | 112                          |
| <i>BcWRKY3</i>   | ORF amplication        | ATGGCAGAGAATGAAGAAGAACAAC     | TCAAGTGATTGCTCTTCTTTAAGC     | 1428                         |
|                  | qRT-PCR                | AGAAGCAAGTCAAAGGTAGCG         | GATTGTGCTGACCCTGTAAATG       | 135                          |
| <i>BcWRKY4</i>   | ORF amplication        | ATGTCGGAGGAAAAAGAAGAACT       | TTAAATGATTGCTCTTCTTTCAG      | 1488                         |
|                  | qRT-PCR                | CTGAAGACGAGCTGATG             | TTACGCCACCTGTATCCA           | 172                          |
| <i>BcWRKY6</i>   | ORF amplication        | ATGACGCAGGATCTGACAGGTTG       | CTATTGATTTTTGTGTTTCCTTC      | 1662                         |
|                  | qRT-PCR                | CGGAAGATAGGACTCGTTCAG         | TTGTTAGACTCGGTTTCAGGAC       | 112                          |
| <i>BcWRKY7</i>   | ORF amplication        | ATGACGGTGGAGCTAATCATGAG       | TTAAAGAGTTTTTTCATGAGGC       | 1047                         |
|                  | qRT-PCR                | CGGTGGATCTGCGTTTAGAG          | GGTCTTGATGTGGTTTTCCG         | 141                          |
| <i>BcWRKY8</i>   | ORF amplication        | ATGTCTAATGAAACCAAAGATC        | TCAAGGTTCTTGTTTGAAGA         | 966                          |
|                  | qRT-PCR                | ACCAAGATCCAACAGTCGTG          | AGCCTGGAGATAGAGACGATG        | 132                          |
| <i>BcWRKY9</i>   | ORF amplication        | ATGGATCTTCTCTCAGACTTGAGAAAG   | CTACATCATCCAATTCACC GGTTTTGG | 987                          |
|                  | qRT-PCR                | AGCTCGAGATGAAATTCCCCG         | AGTGAAAGCCCTAATTCCCC         | 145                          |
| <i>BcWRKY11</i>  | ORF amplication        | ATGGCCGTCGATCTTATGCGCT        | TCATGCCGAAGCAAACACCA         | 999                          |
|                  | qRT-PCR                | GACTTATGAAGGAGAGCACCG         | AACACCAAATCATTAACGCCTG       | 81                           |
| <i>BcWRKY12</i>  | ORF amplication        | ATGGAAGGAGGAAGAAGAGTAG        | TTAAAAGGAAGAGAGACAATC        | 657                          |
|                  | qRT-PCR                | TGACGATGGATACAAATGGCG         | ACCATTCTACAATCTCCGACAG       | 141                          |
| <i>BcWRKY13</i>  | ORF amplication        | ATGGGTACGATAAAACCAAGGAAT      | TCACCAGAAGAAGTTGGAGAG        | 882                          |
|                  | qRT-PCR                | GAAGCCGTTAGGAGTAGTG           | GGATGTTGAGTGTCTTGAC          | 168                          |
| <i>BcWRKY15</i>  | ORF amplication        | ATGGCGGTGGAGTCTCATGACTAG      | TCAAGACGATTCCAAAATGAG        | 960                          |
|                  | qRT-PCR                | AGTCCGAGCACATGAAACAC          | ACTATTGTGGAGAGGCTTTGAG       | 142                          |
| <i>BcWRKY18</i>  | ORF amplication        | ATGGACTGTCTTCGTTTCTCG         | TCATGTTCTAGACTGCTCCATC       | 969                          |
|                  | qRT-PCR                | CGAAGGAGGAGGTCAAGGTT          | TGGTGATGTAGTGCGTAGTAGT       | 157                          |
| <i>BcWRKY20</i>  | ORF amplication        | TCATGTTCTAGACTGCTCCATC        | CTAAGGACCCGACTGTATTCTC       | 1608                         |
|                  | qRT-PCR                | GGCGTAAGTATGGTCAGAAGG         | CATCGTGATTGTGTTTGTCTGG       | 98                           |
| <i>BcWRKY21</i>  | ORF amplication        | ATGGAGGAGATAGAAGGAAC          | CTCAAACCGTGACAACCTAA         | 1020                         |
|                  | qRT-PCR                | CCCCTGATTCCCTCACTTTAG         | TGAGCCTGTAACCGTTCATG         | 119                          |
| <i>BcWRKY22</i>  | ORF amplication        | CTCAAACCGTGACAACCTAA          | TCATATTCACCGCTAGCTG          | 897                          |
|                  | qRT-PCR                | AGCCCTGTTTTACCTTCG            | TTCTGGTTTTGTCTCTGTCTGG       | 149                          |
| <i>BcWRKY23</i>  | ORF amplication        | ATGGAGTTACTAGTTTTATC          | CTACTCTTCTTCAACATATGAC       | 972                          |
|                  | qRT-PCR                | CTAACTCGTCTCGTTTTCTCTC        | TCTCTTGTCTCGCTTCAGGC         | 148                          |

|                 |                 |                          |                            |      |
|-----------------|-----------------|--------------------------|----------------------------|------|
| <i>BcWRKY24</i> | ORF amplication | ATGGAAAGACAAGACATAATTC   | TCAAAGATTAGAAAACTGGAG      | 531  |
|                 | qRT-PCR         | CCTCCGTTAGCACTTCCTG      | TCTTCCCTTGATCTCCGATTG      | 115  |
| <i>BcWRKY25</i> | ORF amplication | ATGTCGTCTACTTCTTTCTC     | TCATGACCGACGCAGCGAGGTTG    | 1122 |
|                 | qRT-PCR         | AGATTTTCCCTGGCAGCTAC     | TCCAAACTCACGATGAACCG       | 124  |
| <i>BcWRKY26</i> | ORF amplication | ATGGCCTCTTCAACCAGCAAAG   | TTATGCTTTCCTTCGTAAGTAG     | 894  |
|                 | qRT-PCR         | CTCTGAAGATGGGTACAACCTGG  | TGTGAGGCAGTTGGATACG        | 103  |
| <i>BcWRKY28</i> | ORF amplication | ATGTCCAATGAAACCAAAGAT    | TCAATGCTCTTGCTGAAGAAAATG   | 939  |
|                 | qRT-PCR         | ACCAATTCCTTCATCCTTCTC    | GAGGCAATCAGTGAAGGAGTAG     | 116  |
| <i>BcWRKY29</i> | ORF amplication | ATGGGTGAGGTGACTTATATGGAC | TTAGTAATCCATAAGTACCCATTG   | 927  |
|                 | qRT-PCR         | TGGACGAAGGAGATTTAGAAGC   | GGCAAAACGGAGGTGAAAAC       | 99   |
| <i>BcWRKY30</i> | ORF amplication | ATGGAGAGGAAAAGTAATAGTG   | TTAGAACCCTCTAAAACCTTTGA    | 942  |
|                 | qRT-PCR         | AACAAGTCCAGAGATCCAACG    | GTGTTCTGTGGCTGGTTG         | 140  |
| <i>BcWRKY31</i> | ORF amplication | ATGTTTCGTTTTCCGGTGAGT    | TTATTGCCTCTCAACACTGCTTGTC  | 1560 |
|                 | qRT-PCR         | CCTATCAGGTTCCACAATGTGCG  | GAGGTCTAGTGAATGGTTGGG      | 139  |
| <i>BcWRKY32</i> | ORF amplication | ATGGAGAAGAGCACGCAGGAGAC  | CTAGCCACCAACAACATCCAATGC   | 1899 |
|                 | qRT-PCR         | AGGAAGATGTAAGCGTGGTTG    | GATGGGTGAGTAGGAGATGTTTC    | 82   |
| <i>BcWRKY33</i> | ORF amplication | ATGGCTGCTTCTTCTTCTTAC    | TCAGGACAAAAACGAATCGAAAAACG | 1557 |
|                 | qRT-PCR         | CTACTTCTGGTTCGCTTGGAG    | TTCCATTACCATTCCCACCG       | 129  |
| <i>BcWRKY34</i> | ORF amplication | ATGCCTGGTTTTGATAATAACT   | TCATATTTTTGGTAGTCTACTCA    | 1650 |
|                 | qRT-PCR         | CACTGGACTATCGGGAACAAG    | GCTTTGAACCTGCATTGATCC      | 133  |
| <i>BcWRKY36</i> | ORF amplication | ATGATCAAAGAAGAGATCGATTG  | TCACTGCCGTCCAAAAAGTCTG     | 1152 |
|                 | qRT-PCR         | AAACGAATCCTCTTCCACGAG    | CTTTGCACCTGTTTCTTACG       | 76   |
| <i>BcWRKY39</i> | ORF amplication | ATGGAGGAAGTTGAAGCTGCAAAC | TCAGGTGTGAGCTGACTGGGAGGAG  | 1029 |
|                 | qRT-PCR         | TGCTATTCCECAAGTGTTCCTC   | CTGCGACATATGATCAGACCC      | 135  |
| <i>BcWRKY40</i> | ORF amplication | ATGGACCAGTACCCATCATCTTTG | CTACTGTGCGGTTTGATTCTGTTG   | 873  |
|                 | qRT-PCR         | GTGAACATAACCATCCAATGCC   | CAATGGTAGTCACAGGCTCAG      | 111  |
| <i>BcWRKY42</i> | ORF amplication | ATGTTTCGTTTTCCAGTGAGTCT  | CTATTGCCTGTCACCGCTGCTC     | 1551 |
|                 | qRT-PCR         | ACCATGTTGCCTTGTTCCTC     | TTGGATGCTGATTCTGTGAGG      | 92   |
| <i>BcWRKY44</i> | ORF amplication | ATGGATGTGAAAGAGAGTGAAAG  | TTAAATGGCTTGATTAGAATGTTG   | 1230 |
|                 | qRT-PCR         | TTCCTAACCTAGTCCCGAGAG    | TGCTTCTGTCCGTAATTCCTC      | 106  |
| <i>BcWRKY46</i> | ORF amplication | ATGGTGATGGAAGAGAACTCG    | TCACCAATTCAAAACGTCACAC     | 858  |
|                 | qRT-PCR         | ACTACGAGATTGAGAATGCTGG   | AGTTCTCAACGGAAGCAGG        | 135  |
| <i>BcWRKY47</i> | ORF amplication | ATGGAAGAACACTCTCAAGATGGC | TTAGGTGGTGGAGAAAGTGGTGC    | 1512 |
|                 | qRT-PCR         | TCCCATACACTTCCACAATCG    | GTTGGTGAGGTCTAGAGTTATGG    | 74   |
| <i>BcWRKY48</i> | ORF amplication | ATGGAGAAGAAGATAGAACATC   | TCATTCTTATCCTCTTCAACG      | 1200 |
|                 | qRT-PCR         | GTGGAGTGAAGAAGAGAGTGG    | TCAAGGATTGGTGACGTGAG       | 136  |

|                 |                   |                          |                           |      |
|-----------------|-------------------|--------------------------|---------------------------|------|
| <i>BcWRKY51</i> | ORF amplification | ATGAATCCCTCTCAAAGCCCTAGC | TCAACATGGTGGAAATGTTTGA    | 597  |
|                 | qRT-PCR           | ACTTCATCTCCGACAACCATC    | CTCTCCATCTTTACTTCCCCTATTT | 123  |
| <i>BcWRKY53</i> | ORF amplification | ATGGAAGGTAAAAAGGATATGT   | ACCAGACTCGATTTATTATTAA    | 972  |
|                 | qRT-PCR           | CGAAGTGACGTACAGAGGAAC    | GTTAGGCGTTTGAGCAATCTG     | 121  |
| <i>BcWRKY54</i> | ORF amplification | ATGGATCCAAATAGTAACAACAC  | TCATATGGCATTGTTCCTTC      | 1020 |
|                 | qRT-PCR           | AGAGCAAGAGAACGACATCAG    | GCCACGCCAATGATAAATCG      | 137  |
| <i>BcWRKY56</i> | ORF amplification | ATGGAAGGGATAGACAACACACAC | TTACAAATCAGAAACTCTGGTG    | 564  |
|                 | qRT-PCR           | AAGGGAAAGGCAAGAGATCG     | GCATCTGTAATAGCTCCTGGG     | 149  |
| <i>BcWRKY57</i> | ORF amplification | ATGACCGATCTGAAGATCCCG    | TCAAGGATTGCGCATGGTTGA     | 885  |
|                 | qRT-PCR           | ACTCAACCCTAAAACACCG      | TTCTGTCCATACTTACGCCATC    | 145  |
| <i>BcWRKY58</i> | ORF amplification | ATGGCGGTGGAGGACGATGTATC  | TTAACCTCTTCTATTCTTGGCGGT  | 3195 |
|                 | qRT-PCR           | AACAAGACCACGATCACAG      | CTCCACCGCCAAATAGATACG     | 74   |
| <i>BcWRKY59</i> | ORF amplification | ATGAACTACCCTTCAAACCCT    | TCACACAGTCTGATCCGAGTTTG   | 546  |
|                 | qRT-PCR           | TCCATTTCCGAGGCATTACC     | AGGGCTTGGGTGATTATGTC      | 130  |
| <i>BcWRKY60</i> | ORF amplification | ATGGACTGTTCTTCTCTCTCG    | TCATGTTCTAGACTGCCTCATC    | 927  |
|                 | qRT-PCR           | CAAGAGATAACCCTTCGCCTAG   | AAGTGGTTATGTGTCCCTTCG     | 136  |
| <i>BcWRKY61</i> | ORF amplification | ATGGAGAAGGAAGAGTTCTTG    | TTAAGGGCTTCTTCGGCTTCACTC  | 1662 |
|                 | qRT-PCR           | GCAACATTAGCACCCATCAAC    | GATGTGGAGACGATGAGGAAG     | 108  |
| <i>BcWRKY62</i> | ORF amplification | ATGAAGGAGTGTATGACAGAGAAC | TCATGATAAGTCACTTGATGTGCG  | 837  |
|                 | qRT-PCR           | ATCCAATAACTCATCTCCCCAAG  | TTCGTGTCTGCGGTAATCTG      | 118  |
| <i>BcWRKY64</i> | ORF amplification | ATGTTTACGCGCTGACAAGG     | TCAAACGAGGAAAGGATTGTGAT   | 777  |
|                 | qRT-PCR           | TTCTAACACTCAACCACCCG     | GTTTTGAAGCGGAGTTGGTG      | 139  |
| <i>BcWRKY65</i> | ORF amplification | ATGAAGCGAGGTCTAGATATG    | TCAAAAGATCTCAACCTGTG      | 786  |
|                 | qRT-PCR           | TCACCAAATCTCCAACCTC      | AATCTGACGGTGGAGTTGTG      | 148  |
| <i>BcWRKY66</i> | ORF amplification | ATGTCTACGAAAGCGCTTACCGC  | TCAAACGTGAAAGGATTGTAAT    | 738  |
|                 | qRT-PCR           | TTGATTCCTTCTCTTCGCTC     | TGGGTTGCCTTGTCTGAG        | 85   |
| <i>BcWRKY67</i> | ORF amplification | ATGGATGTGCTAATAATAAC     | CTACCAACTCCAAAGATCTG      | 831  |
|                 | qRT-PCR           | GAGGAAGTATGGACAGAAGGAG   | CATCTTGGATTCGGGCTCTAG     | 130  |
| <i>BcWRKY68</i> | ORF amplification | ATGGAGTTTACGAGTTTTATC    | TTACTCTTCTTCAACATATG      | 960  |
|                 | qRT-PCR           | TTCTCAGCACCATTCACTCC     | TCCACTTTCGACGTCACATAC     | 141  |
| <i>BcWRKY69</i> | ORF amplification | ATGCACCATAGAGGAATTCAAG   | TCATCTAGAACTATCACAGA      | 849  |
|                 | qRT-PCR           | CGGAGAGGAAGATGAATCACTG   | AAGTCGCATCTCTGTCTGTG      | 111  |
| <i>BcWRKY70</i> | ORF amplification | ATGGATATTGCTTGTAATAAC    | CTAAACCGAAAACGTCTGC       | 852  |
|                 | qRT-PCR           | ATCTCCCCGTCTGCTCTAG      | GACTATCGCCAGAATCCTCAAG    | 91   |
| <i>BcWRKY71</i> | ORF amplification | ATGGCTGATCAAGAACAACCTC   | TCAAGATTCTGTCTTCAAAAGCAT  | 1047 |
|                 | qRT-PCR           | TGAAAATGGTCTGCTCCGTAG    | CCCACCGACTGATAATTGACC     | 87   |

|                 |                   |                        |                         |      |
|-----------------|-------------------|------------------------|-------------------------|------|
| <i>BcWRKY72</i> | ORF amplification | ATGGATCTTACAGGTATCCACG | CTAGCTTTTCTCTCCTTGTCACG | 2529 |
|                 | qRT-PCR           | AGTATGCCTTCAACTTCTGGG  | GCGTACAGTGGATAAAGAGGTG  | 147  |
| <i>BcWRKY74</i> | ORF amplification | ATGGCCGTTGATCTAATGCG   | TCATGCCGAAGCAAAACACCA   | 969  |
|                 | qRT-PCR           | CCGTTGATCTAATGCGTTCC   | GTGTTCCATGCTCTGTAGACC   | 86   |
| <i>BcWRKY75</i> | ORF amplification | ATGGTGAATCTAGATACGTCAC | TCATTTCCTATCCTTTTCATTG  | 1062 |
|                 | qRT-PCR           | CAGTGGGTTGTGGAGTGAAG   | ATGGTTGAGGATTGGTGACG    | 146  |
| <i>BcGAPDH</i>  | qRT-PCR           | CAGCGAGCAGTGAACGGTTGA  | TGACAGGAAGCCCAGCACCAA   | 171  |
