# Supplementary material for: Characterization and co-expression analysis of WRKY orthologs involved in responses to multiple abiotic stresses in Pak-choi (Brassica campestris ssp. chinensis)
Source: PubMed Central journal article supplement (PMC4222839; doi:10.1186/1471-2229-13-188), 2013-11-25
Supplement: 1471-2229-13-188-S2.pdf [file 1471-2229-13-188-S2.pdf]

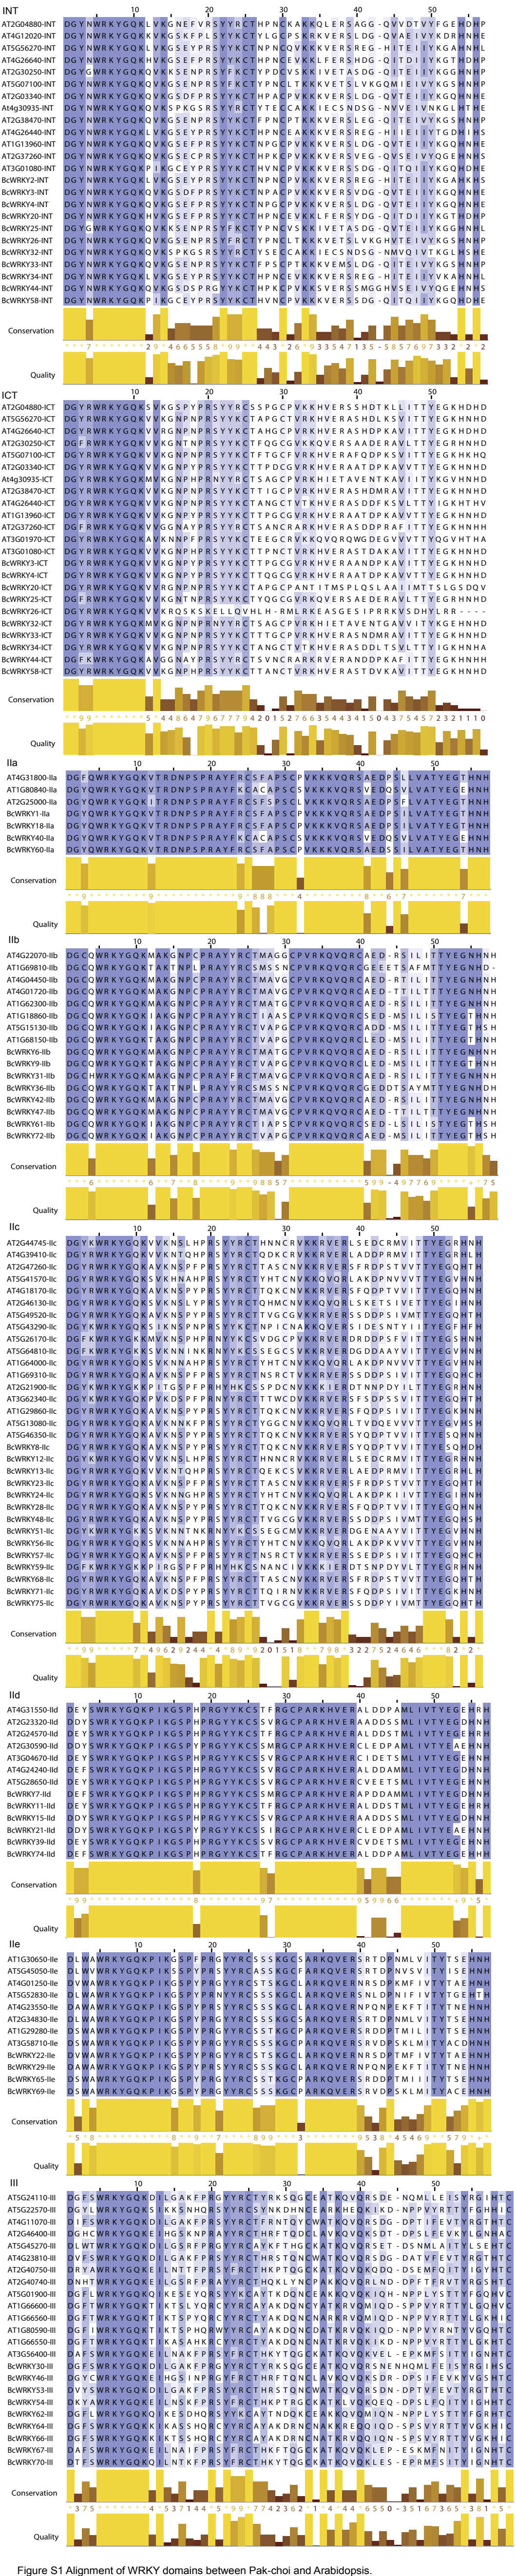

Figure S1 Alignment of WRKY domains between Pak-choi and Arabidopsis.
