# Supplementary material for: Characterization and co-expression analysis of WRKY orthologs involved in responses to multiple abiotic stresses in Pak-choi (Brassica campestris ssp. chinensis)
Source: PubMed Central journal article supplement (PMC4222839; doi:10.1186/1471-2229-13-188), 2013-11-25
Supplement: 1471-2229-13-188-S3.pdf [file 1471-2229-13-188-S3.pdf]

**Supplementary Table S3 Pearson correlation coefficient of stress-induced *BcWRKY* s**

| <b>Gene1</b>    | <b>Gene2</b>    | <b>Correlation coefficient</b> |
|-----------------|-----------------|--------------------------------|
| <i>BcWRKY11</i> | <i>BcWRKY13</i> | 1.000**                        |
| <i>BcWRKY22</i> | <i>BcWRKY26</i> | 0.695**                        |
| <i>BcWRKY64</i> | <i>BcWRKY75</i> | 0.695**                        |
| <i>BcWRKY25</i> | <i>BcWRKY33</i> | 0.680**                        |
| <i>BcWRKY53</i> | <i>BcWRKY54</i> | 0.676**                        |
| <i>BcWRKY53</i> | <i>BcWRKY70</i> | 0.656**                        |
| <i>BcWRKY11</i> | <i>BcWRKY64</i> | 0.644**                        |
| <i>BcWRKY13</i> | <i>BcWRKY64</i> | 0.644**                        |
| <i>BcWRKY46</i> | <i>BcWRKY40</i> | 0.627**                        |
| <i>BcWRKY11</i> | <i>BcWRKY75</i> | 0.616**                        |
| <i>BcWRKY13</i> | <i>BcWRKY75</i> | 0.616**                        |
| <i>BcWRKY54</i> | <i>BcWRKY75</i> | 0.603**                        |
| <i>BcWRKY2</i>  | <i>BcWRKY54</i> | 0.598**                        |
| <i>BcWRKY33</i> | <i>BcWRKY46</i> | 0.597**                        |
| <i>BcWRKY8</i>  | <i>BcWRKY75</i> | 0.580**                        |
| <i>BcWRKY33</i> | <i>BcWRKY75</i> | 0.575**                        |
| <i>BcWRKY6</i>  | <i>BcWRKY40</i> | -.571**                        |
| <i>BcWRKY25</i> | <i>BcWRKY40</i> | 0.566**                        |
| <i>BcWRKY33</i> | <i>BcWRKY53</i> | 0.562**                        |
| <i>BcWRKY46</i> | <i>BcWRKY70</i> | 0.551**                        |
| <i>BcWRKY54</i> | <i>BcWRKY64</i> | 0.550**                        |
| <i>BcWRKY33</i> | <i>BcWRKY70</i> | 0.546**                        |
| <i>BcWRKY53</i> | <i>BcWRKY75</i> | 0.546**                        |
| <i>BcWRKY33</i> | <i>BcWRKY40</i> | 0.541**                        |
| <i>BcWRKY53</i> | <i>BcWRKY64</i> | 0.540**                        |
| <i>BcWRKY6</i>  | <i>BcWRKY11</i> | 0.528**                        |
| <i>BcWRKY6</i>  | <i>BcWRKY13</i> | 0.528**                        |
| <i>BcWRKY33</i> | <i>BcWRKY54</i> | 0.520**                        |
| <i>BcWRKY21</i> | <i>BcWRKY39</i> | 0.507**                        |
| <i>BcWRKY23</i> | <i>BcWRKY33</i> | 0.503*                         |
| <i>BcWRKY23</i> | <i>BcWRKY46</i> | 0.503*                         |
| <i>BcWRKY23</i> | <i>BcWRKY34</i> | 0.501*                         |
| <i>BcWRKY18</i> | <i>BcWRKY26</i> | 0.495*                         |
| <i>BcWRKY23</i> | <i>BcWRKY70</i> | 0.493*                         |
| <i>BcWRKY18</i> | <i>BcWRKY70</i> | 0.482*                         |
| <i>BcWRKY40</i> | <i>BcWRKY70</i> | 0.479*                         |
| <i>BcWRKY11</i> | <i>BcWRKY54</i> | 0.471*                         |
| <i>BcWRKY13</i> | <i>BcWRKY54</i> | 0.471*                         |
| <i>BcWRKY54</i> | <i>BcWRKY70</i> | 0.461*                         |
| <i>BcWRKY6</i>  | <i>BcWRKY25</i> | -.439*                         |
| <i>BcWRKY26</i> | <i>BcWRKY40</i> | 0.438*                         |
| <i>BcWRKY60</i> | <i>BcWRKY70</i> | 0.433*                         |
| <i>BcWRKY18</i> | <i>BcWRKY33</i> | 0.429*                         |
| <i>BcWRKY26</i> | <i>BcWRKY60</i> | 0.427*                         |
| <i>BcWRKY22</i> | <i>BcWRKY60</i> | 0.425*                         |
| <i>BcWRKY8</i>  | <i>BcWRKY11</i> | 0.424*                         |
| <i>BcWRKY8</i>  | <i>BcWRKY13</i> | 0.424*                         |
| <i>BcWRKY34</i> | <i>BcWRKY46</i> | 0.424*                         |
| <i>BcWRKY18</i> | <i>BcWRKY40</i> | 0.420*                         |
| <i>BcWRKY18</i> | <i>BcWRKY23</i> | 0.419*                         |
| <i>BcWRKY25</i> | <i>BcWRKY70</i> | 0.419*                         |
| <i>BcWRKY23</i> | <i>BcWRKY40</i> | 0.418*                         |
| <i>BcWRKY2</i>  | <i>BcWRKY39</i> | -.411*                         |
| <i>BcWRKY6</i>  | <i>BcWRKY70</i> | -.404*                         |
| <i>BcWRKY18</i> | <i>BcWRKY25</i> | 0.402*                         |
| <i>BcWRKY6</i>  | <i>BcWRKY33</i> | -.399*                         |

\*. Correlation is significant at the 0.05 level (2-tailed).

\*\*. Correlation is significant at the 0.01 level (2-tailed).
