# Supplementary material for: Characterization and co-expression analysis of WRKY orthologs involved in responses to multiple abiotic stresses in Pak-choi (Brassica campestris ssp. chinensis)
Source: PubMed Central journal article supplement (PMC4222839; doi:10.1186/1471-2229-13-188), 2013-11-25
Supplement: 1471-2229-13-188-S5.pdf [file 1471-2229-13-188-S5.pdf]

**Supplementary Table S2 Gateway cloning primers for subcellular localization**

| <b>Gene name</b> | <b>Usage of primer</b> | <b>Sequence(5'-3')<sup>a</sup></b>                     |
|------------------|------------------------|--------------------------------------------------------|
| <i>BcWRKY25</i>  | Forward primer (5'-3') | <u>GGGACAAGTTTGTACAAAAAAGCAGGCTTCATGGATATTGCTTGTA</u>  |
|                  | Reverse primer (5'-3') | <u>GGGACCACTTTGTACAAGAAAGCTGGGTCAGATTCGTGCTTCAAAA</u>  |
| <i>BcWRKY40</i>  | Forward primer (5'-3') | <u>GGGACAAGTTTGTACAAAAAAGCATGAACTACCCTCAAACCCT</u>     |
|                  | Reverse primer (5'-3') | <u>GGGACCACTTTGTACAAGAAAGCTGGGCTTTTTTCGGTTCTGGTTCT</u> |

<sup>a</sup>Under line sequences represent gateway adapter sequences

ATAAC  
GCAT

G
